# Supplementary material for: Poly(vinylidene fluoride)/nickel nanocomposites from semicrystalline block copolymer precursors
Source: Royal Society of Chemistry journal article supplement (doi:10.1039/c2nr32990e), 2012-10-23
Supplement: c2nr32990e.pdf [file c2nr32990e.pdf]

## Poly(vinylidene fluoride)/nickel nanocomposites from semicrystalline block copolymer precursors

Vincent S. D. Voet,<sup>a</sup> Martijn Tichelaar,<sup>a</sup> Stefania Tanase,<sup>b</sup> Marjo C. Mittelmeijer-Hazeleger,<sup>b</sup> Gerrit ten Brinke<sup>\*a</sup> and Katja Loos<sup>\*a</sup>

<sup>a</sup> Department of Polymer Chemistry, Zernike Institute for Advanced Materials, University of Groningen, Nijenborgh 4, 9747 AG Groningen, The Netherlands.

<sup>b</sup> Van 't Hoff Institute for Molecular Sciences, University of Amsterdam, Science Park 904, 1098 XH Amsterdam, The Netherlands.

### Electronic Supplementary Information

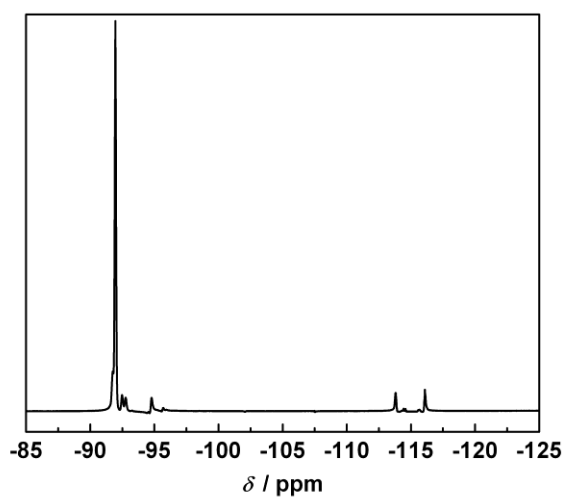

**Figure S1.** <sup>19</sup>F-NMR spectra of chlorine-terminated PVDF in DMSO-*d*<sub>6</sub>.

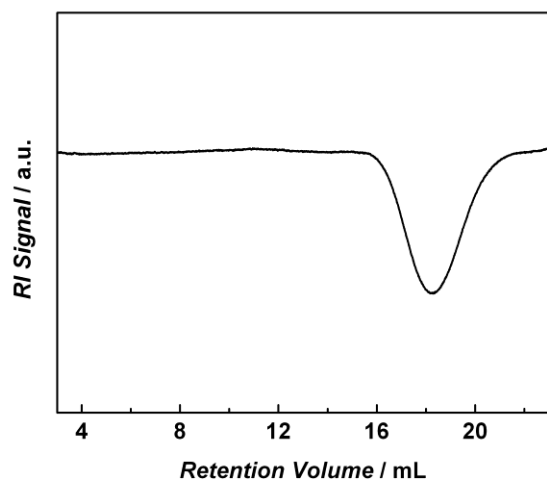

**Figure S2.** GPC trace of chlorine-terminated PVDF **B**.

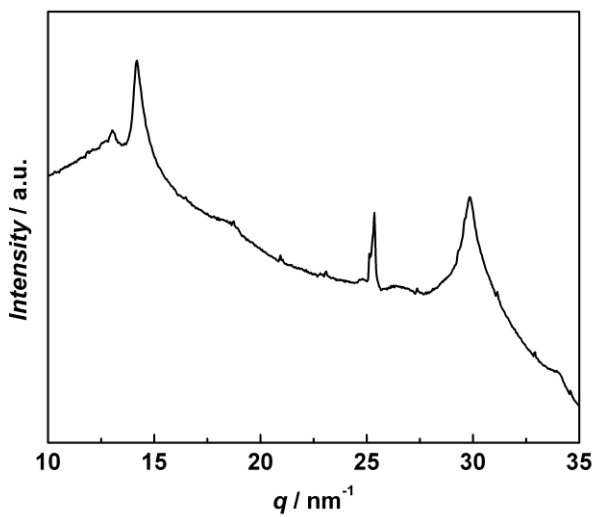

**Figure S3.** Complete WAXS pattern of PVDF/Ni nanocomposite.
